# Supplementary material for: High-quality sika deer omics data and integrative analysis reveal genic and cellular regulation of antler regeneration
Source: HighWire-hosted journal article supplement (doi:10.1101/gr.279448.124), 2024-11-14
Supplement: Supplemental_Information.pdf [file Supplemental_Information.pdf]

**High-quality sika deer omics data and integrative analysis reveal genic and cellular regulation of antler regeneration.**

Zihe Li<sup>1,11</sup>, Ziyu Xu<sup>2,3,11</sup>, Lei Zhu<sup>6,7,11</sup>, Tao Qin<sup>1,11</sup>, Jinrui Ma<sup>1,11</sup>, Zhanying Feng<sup>2,10,11</sup>, Huishan Yue<sup>1</sup>, Qing Guan<sup>9</sup>, Botong Zhou<sup>1</sup>, Ge Han<sup>1</sup>, Guokun Zhang<sup>8</sup>, Chunyi Li<sup>8</sup>, Shuaijun Jia<sup>6,7</sup>, Qiang Qiu<sup>1\*</sup>, Dingjun Hao<sup>6,7\*</sup>, Yong Wang<sup>2,3,4,5\*</sup>, Wen Wang<sup>1,9\*</sup>

<sup>1</sup> New Cornerstone Science Laboratory, Shaanxi Key Laboratory of Qinling Ecological Intelligent Monitoring and Protection, School of Ecology and Environment, Northwestern Polytechnical University, Xi'an 710072, China.

<sup>2</sup>CEMS, NCMIS, HCMS, MADIS, Academy of Mathematics and Systems Science, Chinese Academy of Sciences, Beijing 100190, China.

<sup>3</sup>School of Mathematics, University of Chinese Academy of Sciences, Chinese Academy of Sciences, Beijing 100049, China.

<sup>4</sup>Key Laboratory of Systems Health Science of Zhejiang Province, School of Life Science, Hangzhou Institute for Advanced Study, University of Chinese Academy of Sciences, Hangzhou, 310024, China.

<sup>5</sup>Center for Excellence in Animal Evolution and Genetics, Chinese Academy of Sciences, Kunming 650223, China.

<sup>6</sup>Department of Spine Surgery, Honghui Hospital, Xi'an Jiaotong University, Xi'an, Shaanxi 710054, China

<sup>7</sup>Shaanxi Key Laboratory of Spine Bionic Treatment, Xi'an, Shaanxi 710054, China

<sup>8</sup> Institute of Antler Science and Product Technology, Changchun Sci-Tech University; 130600 Changchun, China

<sup>9</sup>Key Laboratory of Genetic Evolution & Animal Models, Kunming Institute of Zoology, Chinese Academy of Sciences, Kunming, Yunnan 650223, China.

<sup>10</sup>Department of Statistics, Department of Biomedical Data Science, Bio-X Program, Stanford University, Stanford, CA 94305, USA

<sup>11</sup>These authors contributed equally: Zihe Li, Ziyu Xu, Lei Zhu Tao Qin, Jinrui Ma, Zhanying Feng

\* Correspondent authors: wenwang@nwpu.edu.cn (W.W.), ywang@amss.ac.cn (Y.W.), haodingjun@mail.xjtu.edu.cn (D.J.H.), qiuqiang@nwpu.edu.cn (Q.Q.)

33    **This Supplementary Information includes:**

34    **Supplementary Methods**

35    **Supplementary Figures 1 – 11**

36

## 37 **Supplementary Methods**

### 38 **Animal Ethics.**

39 Four 2-year-old male sika deers (*Cervus nippon*) were used for sampling  
40 regenerating antler Tissues. The deer were farmed in an enclosure, provided water and  
41 fed ad libitum, with feed including dry leaves (mainly oak tree leaves) and grass and  
42 some cooked grains (mainly soya bean cakes). All experimental protocols and  
43 procedures were approved by the Animal Ethics Committee of Changchun Sci-Tech  
44 University (Approval No. CKARI202007). On days 0, 2, 5 and 10 after casting, deer  
45 were anesthetized. The entire pedicles were thoroughly shaved, then after routine  
46 sterilization with 1% iodophor and 75% ethanol, the skin was cut open, pedicle  
47 periosteum or regenerating antler tissue (on the distal end of pedicle) was exposed and  
48 collected, then immediately placed in liquid nitrogen to froze. After sample collection,  
49 all animals were raised until natural death.

### 50 **Genome size estimation.**

51 We used chicken blood cells as an internal standard. 1ml of fresh heparin  
52 anticoagulant blood samples were collected from the veins beneath the wings of four  
53 chickens. The samples were stored on ice and transported back to the laboratory. Each  
54 1 ml of anticoagulant blood was diluted with 10 ml of physiological saline, and then  
55 centrifuged at 4 °C and 1500 rpm for 10 minutes. The supernatant was discarded, and  
56 this step was repeated twice. Finally, 1 ml of physiological saline was used to suspend

57 the red blood cells, and chicken red blood cells were added to Galbraith's buffer at a  
58 ratio of 1:100 to prepare the chicken cell nuclear suspension.

59 Four sika deers were anesthetized, and 1 ml of fresh heparin anticoagulant blood  
60 samples were collected from their neck arteries. The samples were stored on ice and  
61 transported back to the laboratory. Each 1 ml of anticoagulant blood was diluted with  
62 10 ml of physiological saline, and then centrifuged at 4 °C and 1500 rpm for 10  
63 minutes. The supernatant was discarded, and this step was repeated twice. Finally, 1  
64 ml of physiological saline was used to suspend the cells (after centrifugation, mainly  
65 white blood cells were obtained, along with a small number of other cells), and deer  
66 cells were added to Galbraith's buffer at a ratio of 1:100 to prepare the deer cell  
67 nuclear suspension. As a control sample, 1 ml of fresh heparin anticoagulant blood  
68 samples were collected from the tail veins of four rats. Each 1 ml of anticoagulant  
69 blood was diluted with 10 ml of physiological saline, and then centrifuged at 4 °C and  
70 1500 rpm for 10 minutes. The supernatant was discarded, and this step was repeated  
71 twice. Finally, 1 ml of physiological saline was used to suspend the red blood cells,  
72 and rat cells were added to Galbraith's buffer at a ratio of 1:100 to prepare the rat cell  
73 nuclear suspension.

74 After preparing the cell nuclear suspension samples for deer, chicken, and rat, the  
75 relative fluorescence positions of the two samples were determined. The deer and rat  
76 cell nuclear suspensions were mixed in a ratio of 10:1, and the rat and chicken cell  
77 nuclear suspensions and the deer and chicken cell nuclear suspensions were mixed in

78 a ratio of 500:3. Then, 50  $\mu$ l of propidium iodide (PI) staining solution was added, and  
79 the samples were stained in a dark environment at 4 °C for 20 minutes.

80 The cell nuclear suspensions were filtered through a 20  $\mu$ m nylon membrane,  
81 transferred to flow cytometry tubes, and analyzed using a BD FACSCelesta 3 laser.  
82 The stained samples were detected under excitation light at 488 nm, and the relative  
83 fluorescence signals of the 2C nuclei of the internal standard samples and the test  
84 samples were measured to determine the average fluorescence peak. At least 10,000  
85 nuclear fluorescence signals were collected for each sample, and the coefficient of  
86 variation (CV) was controlled within 5%.

#### 87 **Single cell RNA-seq library preparation and sequencing**

88 Liver sample was pooled, minced with a razor blade, and digested with collagenase I  
89 (100  $\mu$ g/ml) + collagenase II (100  $\mu$ g/ml) + collagenase IV (30  $\mu$ g/ml) mixed solution  
90 (Gibco, 17100017, 17101015, and 17104019) at 37°C for 60 min (or until the tissues  
91 were fully digested), with intermittent shaking. Single cell suspensions were  
92 sequentially filtered through 70  $\mu$ m and 40  $\mu$ m cell strainers (Corning, 352350 and  
93 352340), and centrifuged at 500  $\times$  g for 5 min. The cell pellets were resuspended in  
94 PBS and treated with the Red Blood Cell Lysis Buffer (Solarbio, R1010) to remove  
95 red blood cells. Live cells were then washed with PBS twice, resuspended in 0.04%  
96 UltraPure BSA solution (Thermo, 23209), and counted using a Countess automated  
97 cell counter (Bio-Rad TC20, US). Live cells (confirmed by staining with 7-  
98 aminoactinomycin D [BD Biosciences, 51- 68981E]; 90–95% viability after sorting)

were collected from samples collected at each stage, resuspended at  $1 \times 10^3$  cells/ml and single cells were obtained using a Chromium Controller (10× Genomics, US). We followed a standard protocol for scRNA-seq library construction (10× Genomics, US). The libraries were sequenced with an Illumina NovaSeq6000 platform (Novogene, China).

#### **ATAC-seq library preparation and sequencing.**

ATAC-seq was performed as previously reported (Buenrostro et al. 2013). Briefly, nuclei were extracted from samples, and the nuclei pellet was resuspended in the Tn5 transposase reaction mix. The transposition reaction was incubated at 37°C for 30 min. Equimolar Adapter 1 and Adapter 2 were added after transposition, PCR was then performed to amplify the library. After the PCR reaction, libraries were purified with the AMPure beads and library quality was assessed with Qubit. The clustering of the index-coded samples was performed on a cBot Cluster Generation System using TruSeq PE Cluster Kit v3-cBot-HS (Illumina) according to the manufacturer's instructions. After cluster generation, the library preparations were sequenced on an Illumina HiSeq platform and 150 bp paired-end reads were generated.

#### **RNA-seq library preparation and sequencing.**

A total amount of 1 µg RNA per sample was used as input material for the RNA sample preparations. Sequencing libraries were generated using NEBNext® Ultra™

119 RNA Library Prep Kit for Illumina® (NEB, USA) following manufacturer's  
120 recommendations and index codes were added to attribute sequences to each sample.  
121 Briefly, mRNA was purified from total RNA using poly(T) oligo-attached magnetic  
122 beads. Fragmentation was carried out using divalent cations under elevated  
123 temperature in NEBNext First Strand Synthesis Reaction Buffer(5X). First-strand  
124 cDNA was synthesized using random hexamer primer and M-MuLV Reverse  
125 Transcriptase (RNase H). Second-strand cDNA synthesis was subsequently performed  
126 using DNA Polymerase I and RNase H. Remaining overhangs were converted into  
127 blunt ends via exonuclease/polymerase activities. After adenylation of 3' ends of DNA  
128 fragments, NEBNext Adaptor with hairpin loop structure were ligated to prepare for  
129 hybridization. In order to select cDNA fragments of preferentially 250~300 bp in  
130 length, the library fragments were purified with AMPure XP system (Beckman  
131 Coulter, Beverly, USA). Then 3 µl USER Enzyme (NEB, USA) was used with size-  
132 selected, adaptor-ligated cDNA at 37°C for 15 min followed by 5 min at 95 °C before  
133 PCR. Then PCR was performed with Phusion High-Fidelity DNA polymerase,  
134 Universal PCR primers and Index (X) Primer. At last, PCR products were purified  
135 (AMPure XP system) and library quality was assessed on the Agilent Bioanalyzer  
136 2100 system. The clustering of the index-coded samples was performed on a cBot  
137 Cluster Generation System using TruSeq PE Cluster Kit v3-cBot-HS (Illumia)  
138 according to the manufacturer's instructions. After cluster generation, the library  
139 preparations were sequenced on an Illumina NovaSeq platform and 150 bp paired-end

140 reads were generated.

#### 141 **HiFi library preparation and sequencing.**

142 Genomic DNA was extracted from liver using the standard  
143 cetyltrimethylammonium bromide method and sequenced using the PacBio in HiFi  
144 mode. SMRTbell library construction and sequencing were performed at Novogene  
145 (Tianjin, China) following the official protocols of PacBio for preparing ~20-544kb  
146 SMRTbell libraries. After obtaining the sequence data, we processed the raw  
147 information with SMRT Link (version 8.0546  
148 <https://github.com/PacificBiosciences/pbcommand>), using the CCS method with  
149 default parameters.

#### 150 **Hi-C library preparation and sequencing.**

151 For Hi-C sequencing, we followed the standard protocol described previously  
152 with minor modifications. In brief, liver of sika deer was used to isolate cells. The  
153 cells were cross-linked and then homogenized by tissue lysis and digested with the  
154 restriction enzyme MboI overnight. The proximal chromatin DNA was re-ligated  
155 using a ligation enzyme. The nuclear complexes were reversely cross-linked by  
156 incubation with Proteinase K at 65°C. DNA was purified using phenol-chloroform  
157 extraction, and biotin was removed from non-ligated fragment ends using T4 DNA  
158 polymerase. The ends of sheared fragments (300–500 base pairs) were repaired using  
159 a mixture of T4 DNA polymerase, T4 polynucleotide kinase, and Klenow DNA



160 polymerase. Biotin-labeled Hi-C samples were specifically enriched using  
161 streptavidin C1 magnetic beads. After adding A-tails to the fragment ends and ligating  
162 Illumina paired-end (PE) sequencing adapters, Hi-C sequencing libraries were  
163 amplified by PCR (12–14 cycles) and sequenced on the Illumina NovaSeq sequencing  
164 platform at Novogene (Tianjin, China).

165

166

167

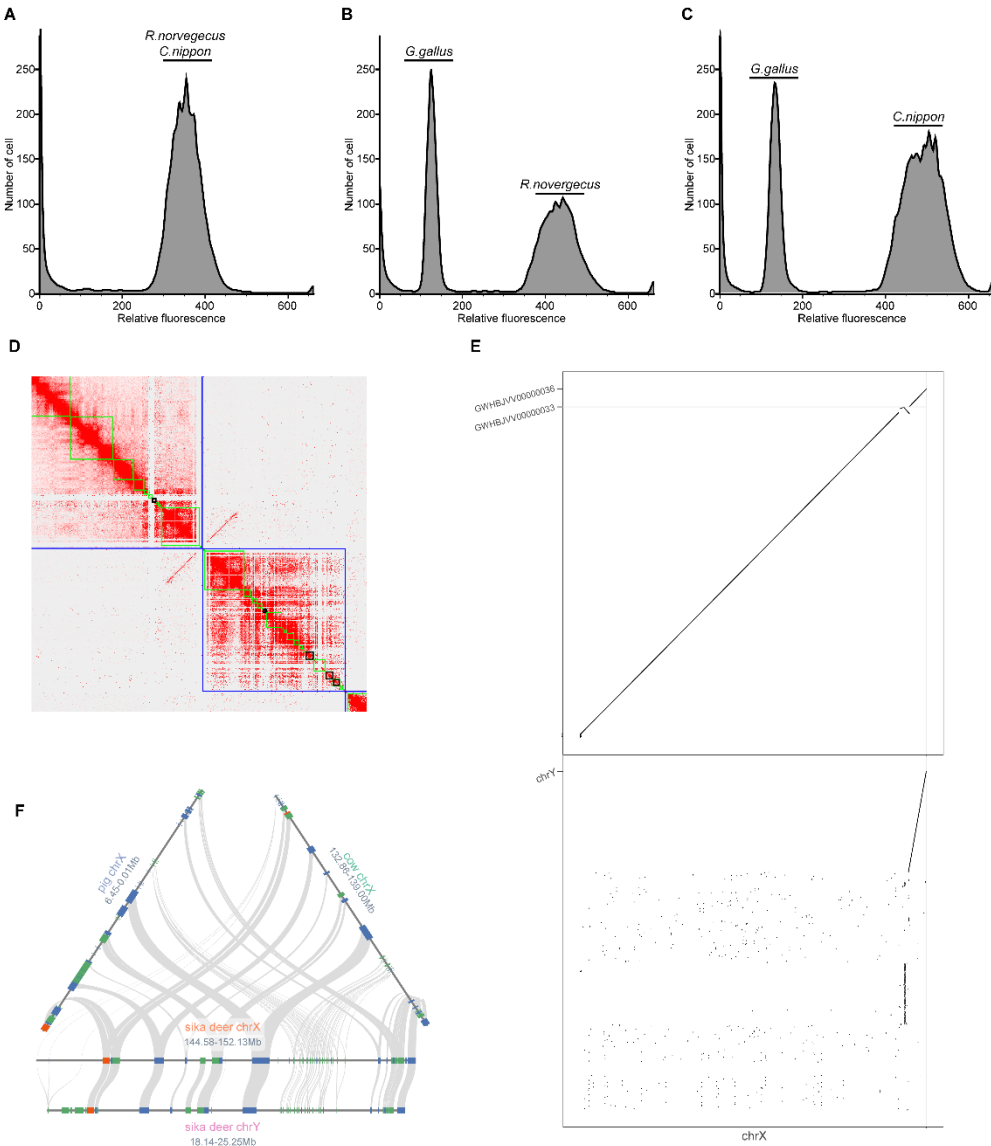

The erythrocyte of chicken (*Gallus gallus*) as an internal reference standard and rat (*Rattus norvegicus*) as a positive control were selected to determine the genome size of sika deer. This figure shows the flow cytometric histogram of relative DNA content of nuclei from (A) mixture of rat and sika deer, (B) mixture of chicken and rat and (C) mixture of sika deer and chicken. (D) Hi-C heatmap for X chromosome and Y chromosome of sika deer. Green blocks referred to contigs and black blocks referred to contigs with switch error phased by hifiasm. (E) Dot plot of genome alignment from previous assembly (upper) and Y chromosome in our assembly to X chromosome in our assembly suggesting that our assembly located PAR regions finely in X and Y chromosome which is lost in previous assembly. (F) Synteny of PAR regions between X chromosomes from cow, pig and sika deer and Y chromosomes of sika deer firstly revealed the structure of PAR in Cervidae. Red blocks referred to starting point of PAR.

183

184

185

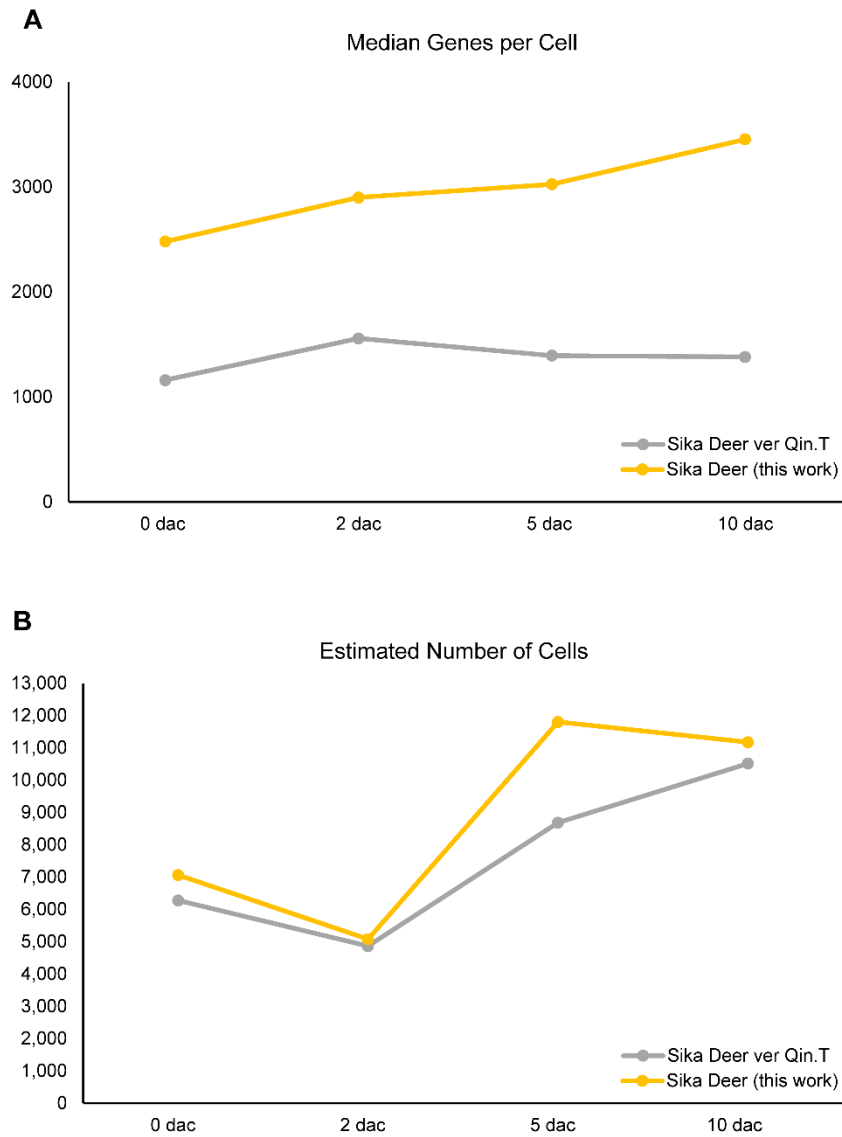

186

187 **Supplementary Figure 2. Single cell RNA-seq quality metrics in different genome**  
 188 **versions.**

189 Line plots to show median genes per cell (A) and estimated number of cells (B)

190 identified using the same scRNA-seq data but different reference genomes.

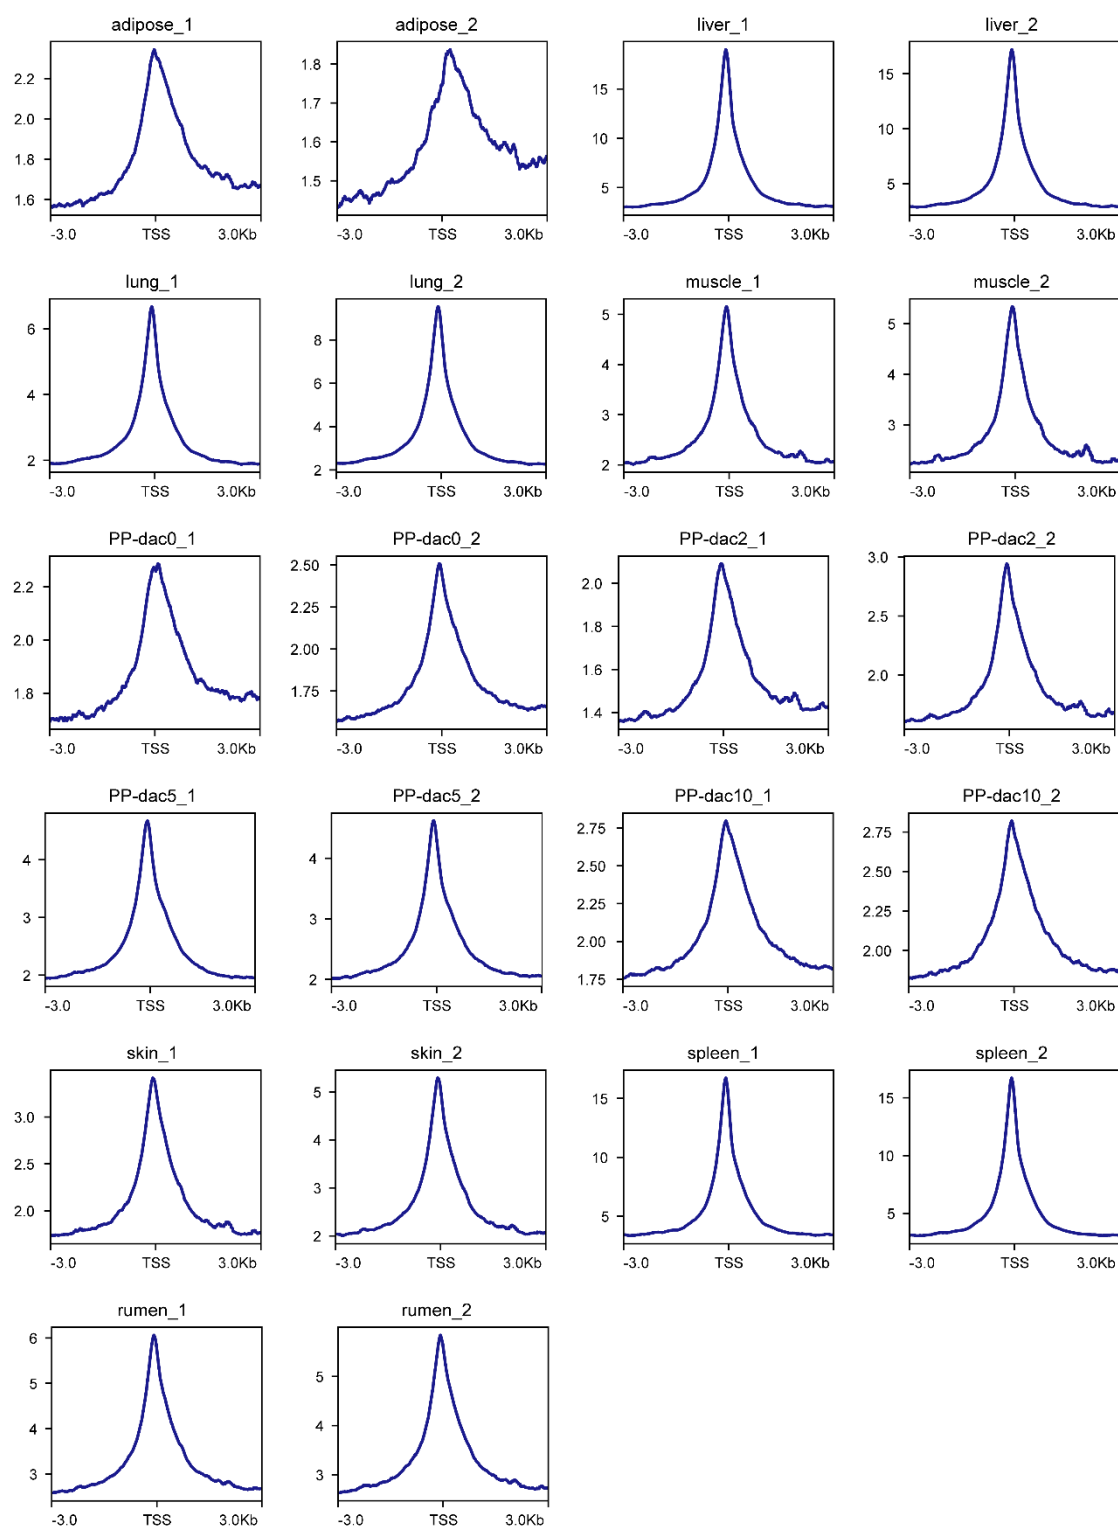

**Supplementary Figure 3. Quality control of ATAC-seq samples.** Line plot to show TSS enrichment analysis of ATAC-seq for each sample suggested high quality of our data.

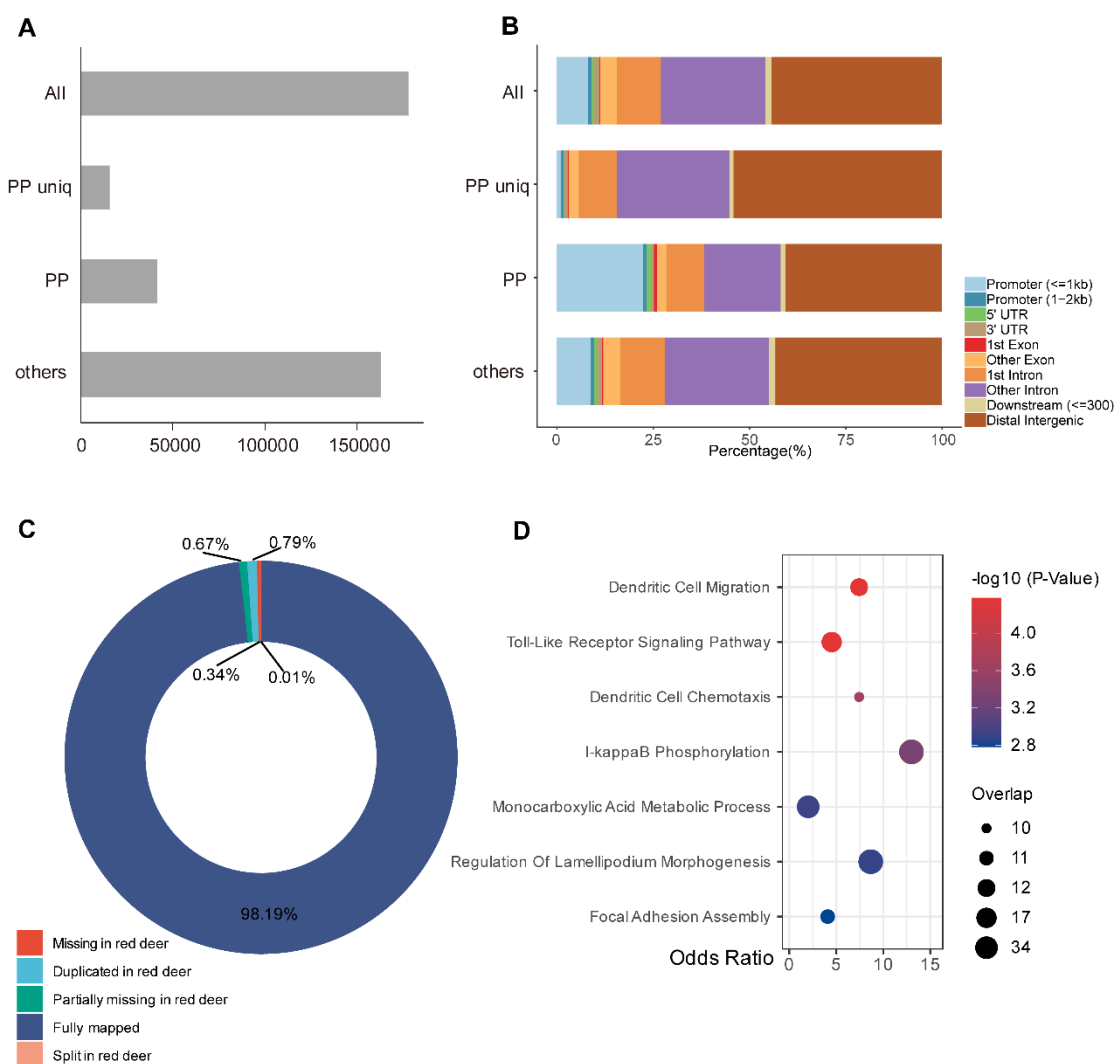

197 **Supplemental Figure 4. Statistic of ATAC-seq peaks.**

198 **A** Bar plot for the number of peaks for all samples and PPs. **B** Bar plot of fraction of  
 199 different type of peaks for all samples and PPs tissue. **C** Pie plot to show the statistic  
 200 of the OCRs mapping from sika deer genome to red deer genome. **D** Bubble plot to  
 201 show functional enrichment of genes related to sika deer-specific OCRs.

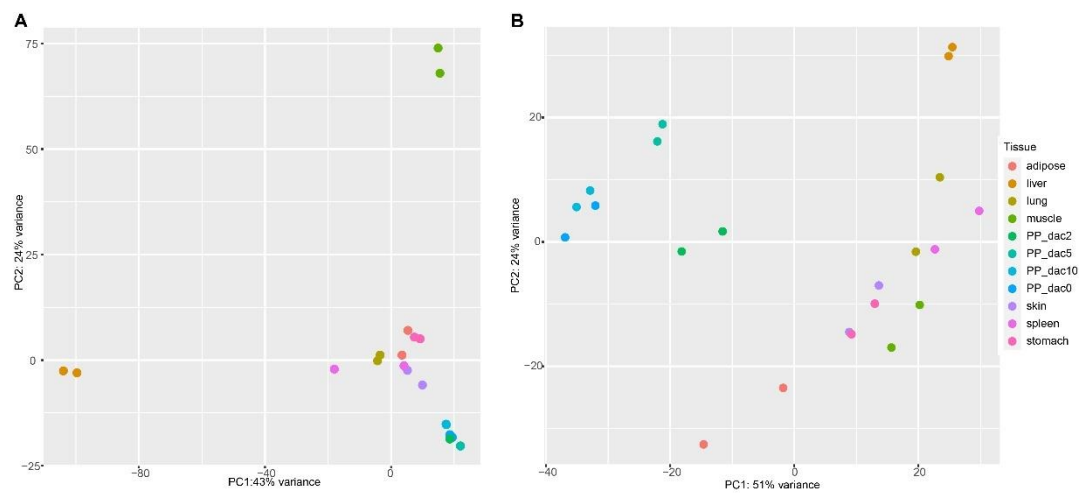

**Supplemental Figure 5. PCA analysis for RNA-seq and ATAC-seq of sika deer**

**major organ and regenerative antler.**

Dot plot to show the PCA analysis of gene expression (**A**) and chromatin accessibility

(**B**) of sika deer major organ.

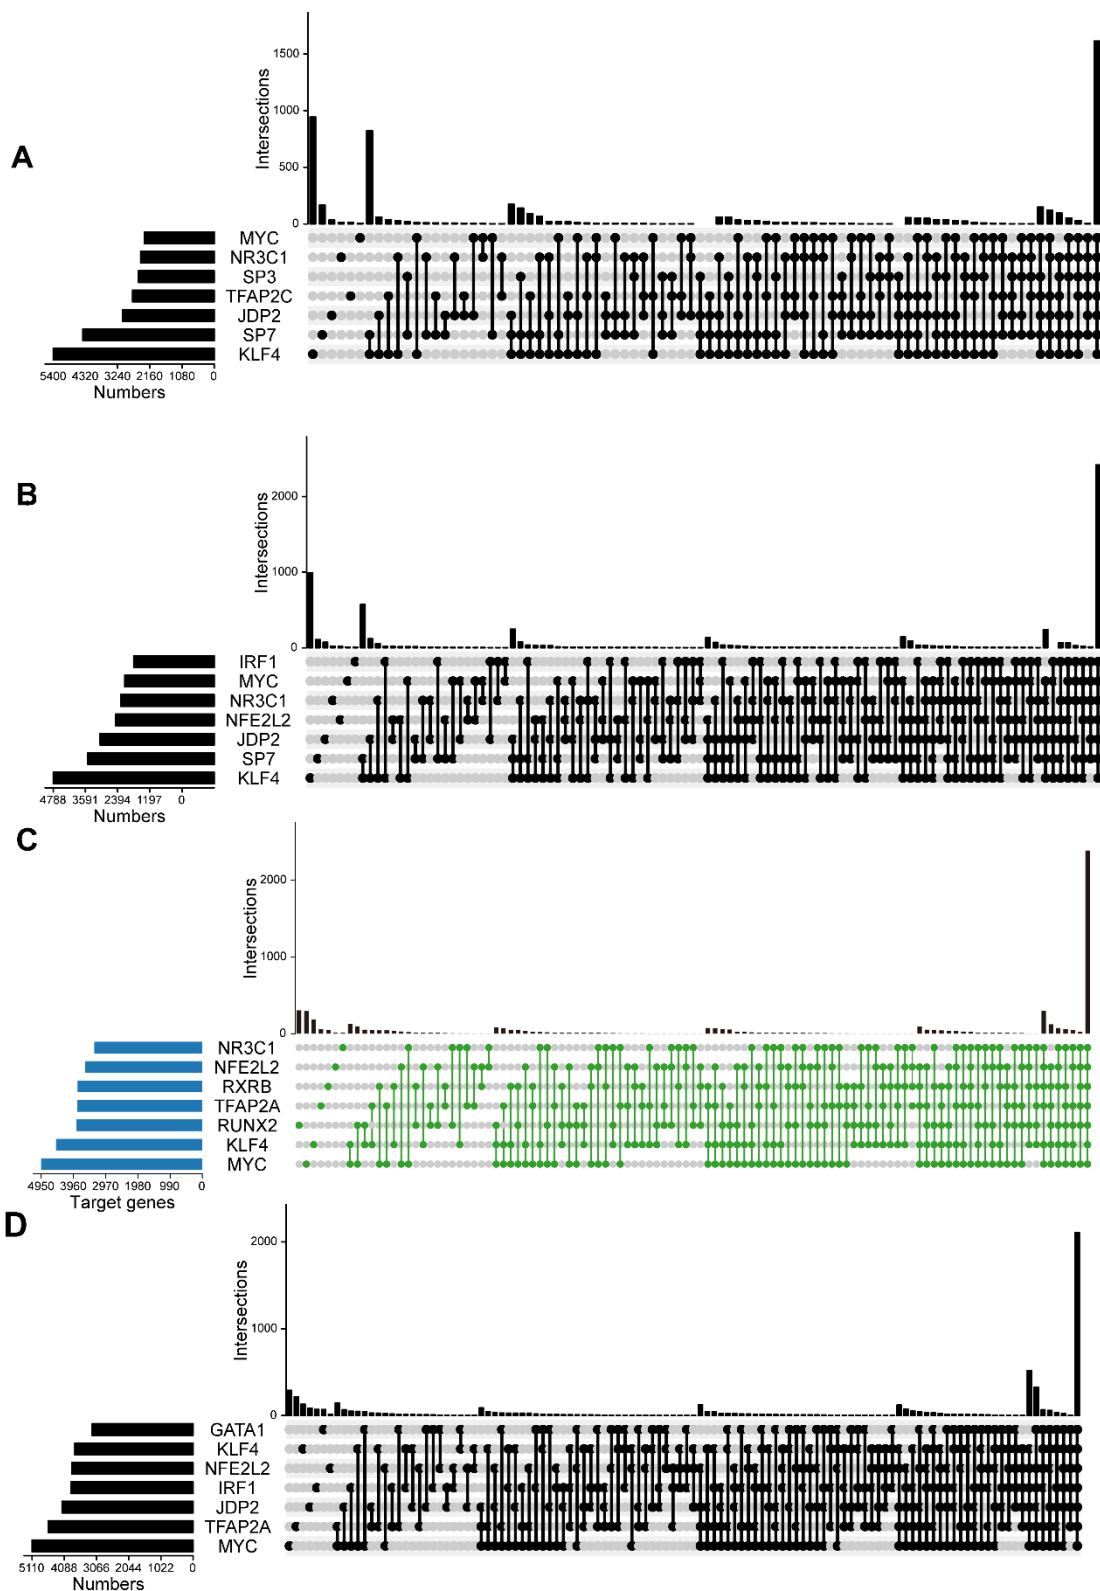

**Supplementary Figure 6. Highly overlap between hub TFs during antler regeneration.**



210 Upset plot to show the overlap in target genes between top 7 hub TFs in (A) dac0, (B)  
 211 dac2, (C) dac5 and (D) dac10 during antler regeneration.

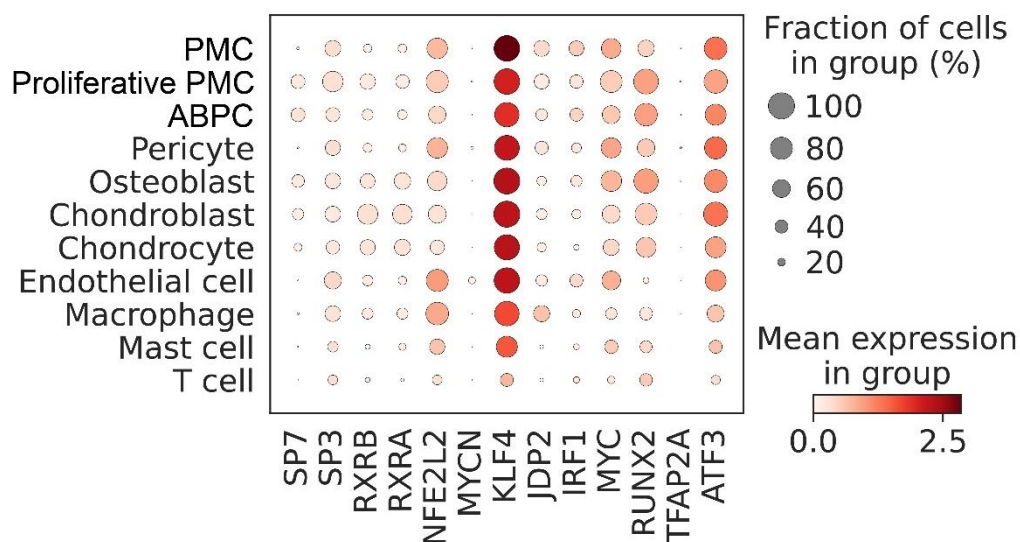

## 212 **Supplementary Figure 7. Cellular expression of hub TFs**

213 Dotplot of cellular expression profile of hub TFs in antler regeneration cell atlas,  
 214 show most hub TFs don't show cellular specificity.

215

216

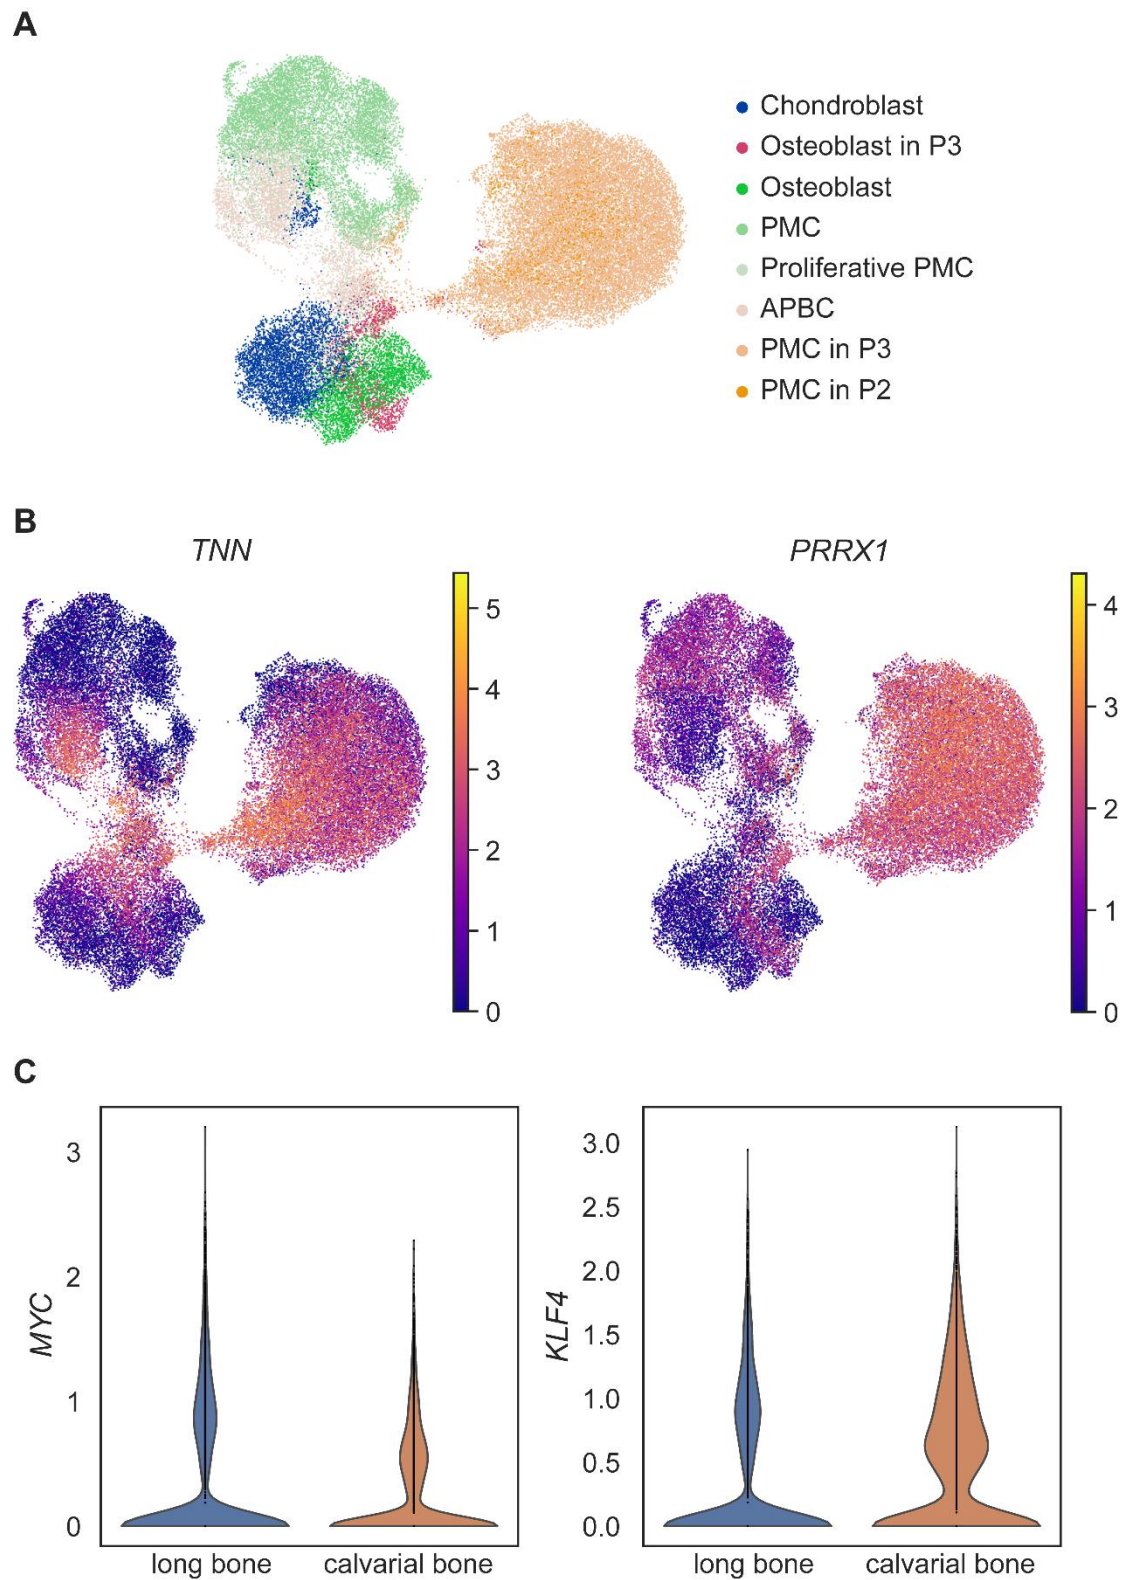

217

218 **Supplementary Figure 8. Comparison between stem cells population from antler**

219 **and mouse digit tip.**

**A** UMAP plot of cell type annotation in stem cell population from antler, regenerative mouse digit tip (P3) and unregenerative mouse digit tip (P2). **B** UMAP plot of gene expression of *PRRX1* (the marker of PRRX1+ mesenchymal stem cell) and *TNN* (the marker of antler blastema progenitor cell). **C** Violin plot to show expression of *MYC* and *KLF4* in long bone and calvarial bone data.

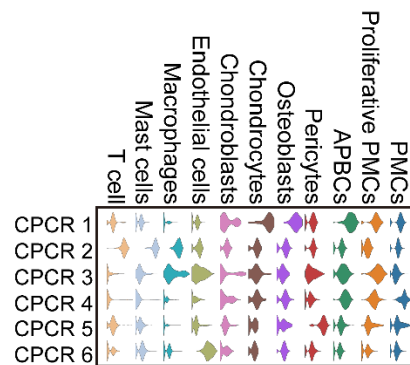

**Supplementary Figure 9. CPCR activity in different cell types.**

Violin plot to show each CPCR activity in different cell types.

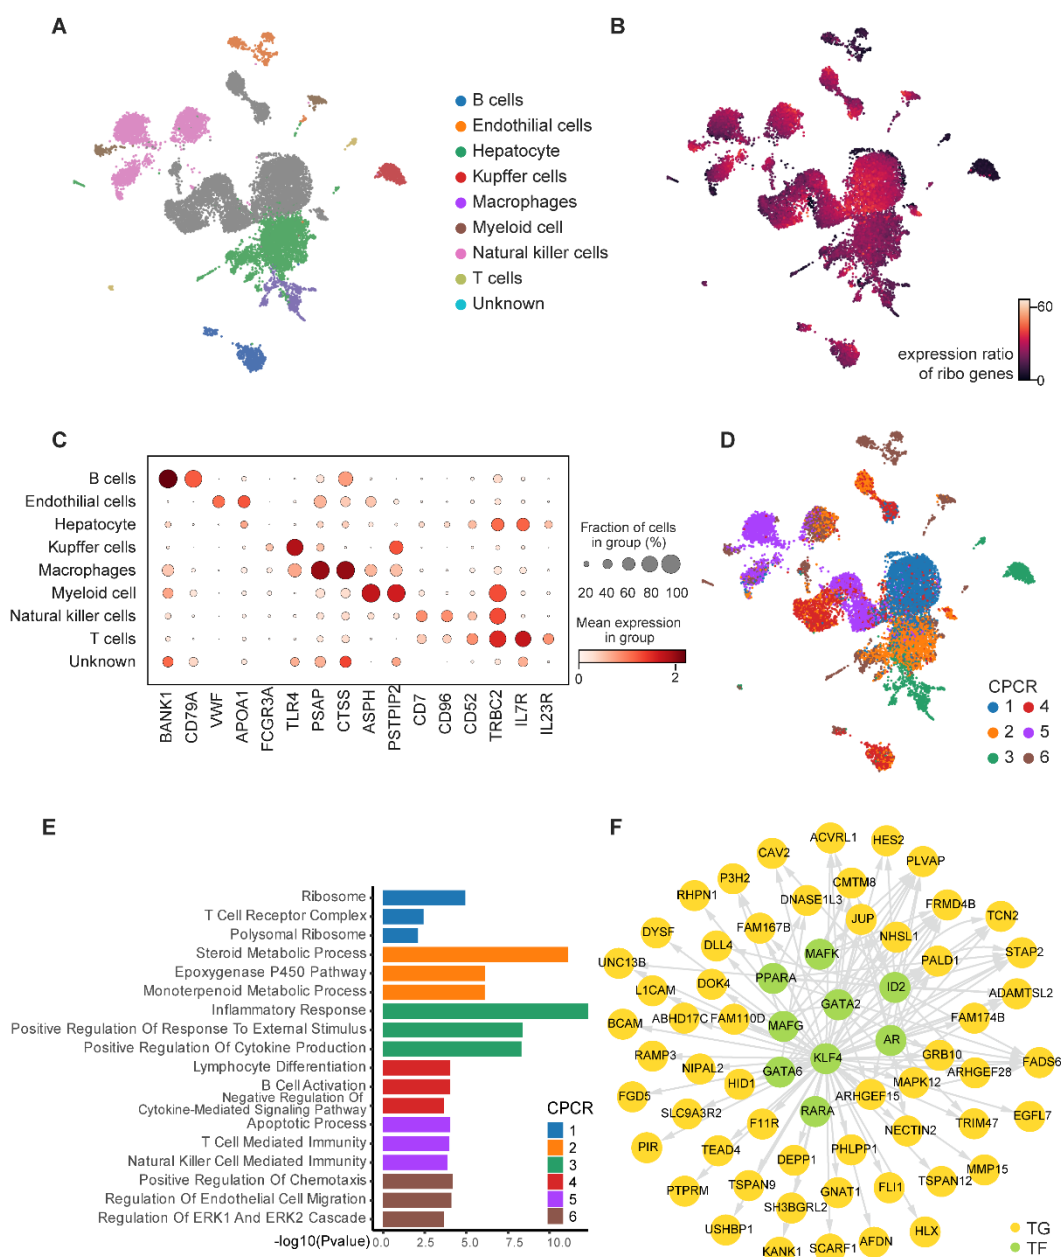

**Supplementary Figure 10. cTOP model in liver scRNA-seq data.**

**A** UMAP plot of cell annotations in sika deer liver. **B** UMAP plot to show percentage of ribosome genes expression in a cell. **C** Dot plot to show marker genes expression in each cell type. **D** UMAP plot to show highest CPR of cells. **E** Functional enrichment for TGs of each CPR. **F** network of shared TFs and TGs between endothelial cell related programs in liver and antler PP.

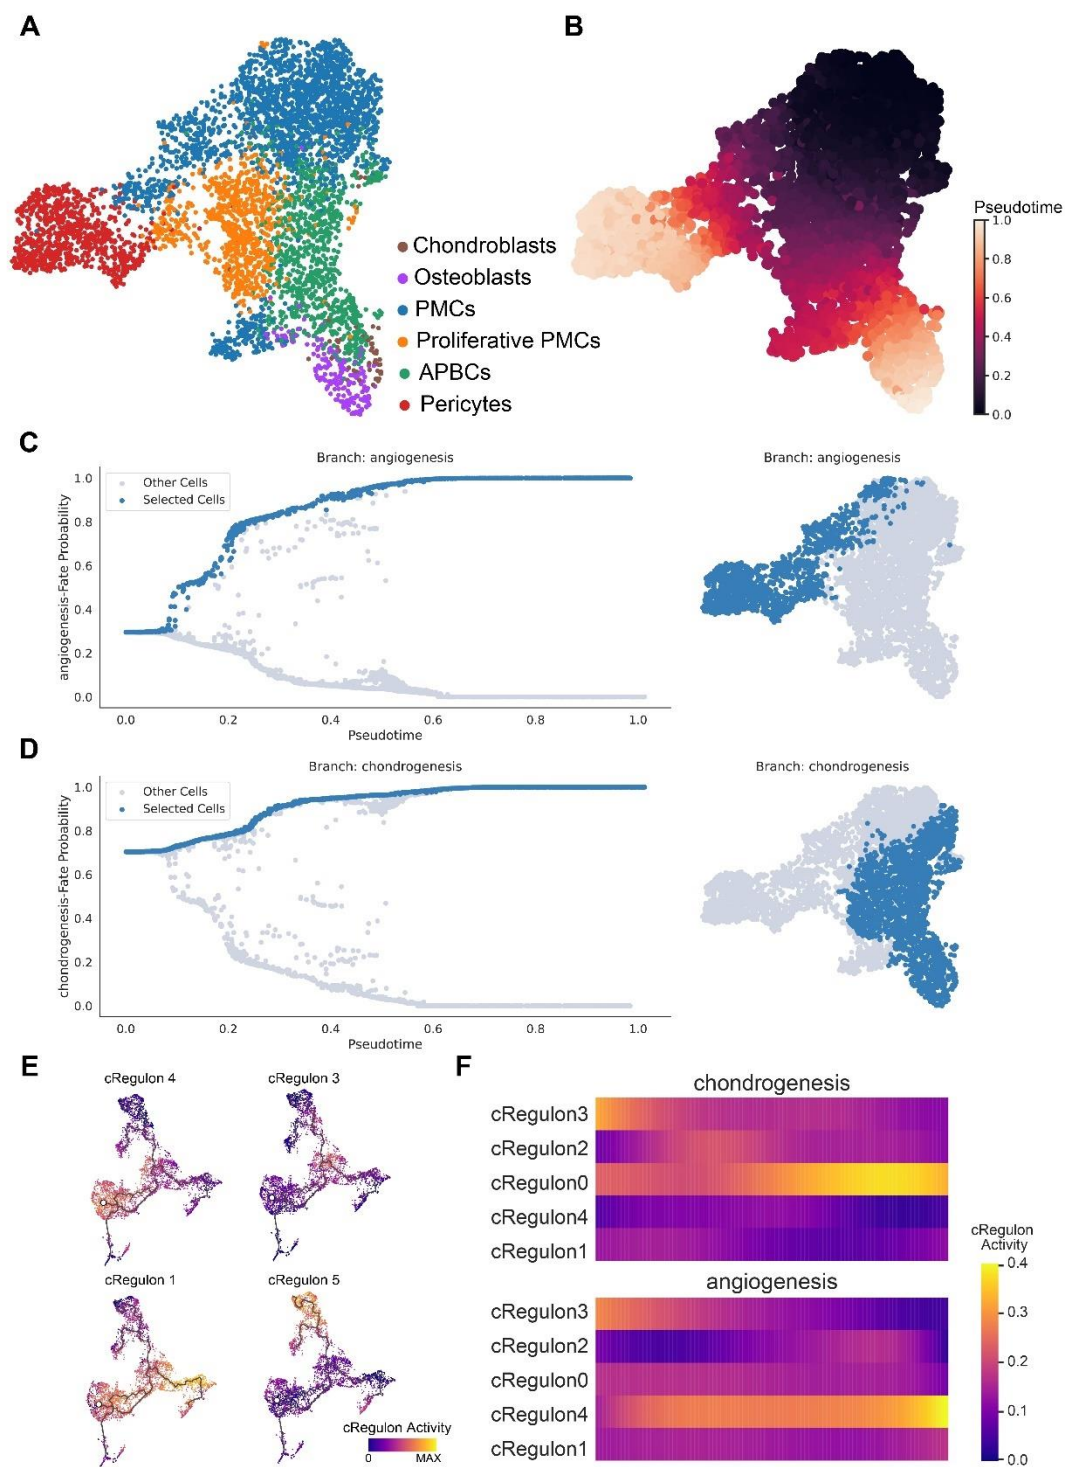

241 UMAP of **(A)** cell type and **(B)** pseudotime in *dac5* cell atlas analyzed using Palantir.  
242 The branching fate to **(C)** angiogenesis and **(D)** chondrogenesis is consisting with the  
243 result from Monocle3 (Fig. 4E). The CPCR activity dynamics across trajectories from  
244 **(E)** Monocle3 and **(F)** Palantir are similar.  
245
