# Supplementary material for: High-quality sika deer omics data and integrative analysis reveal genic and cellular regulation of antler regeneration
Source: HighWire-hosted journal article supplement (doi:10.1101/gr.279448.124), 2024-11-14
Supplement: Supplemental_Tables.xlsx [file Supplemental_Tables.xlsx]

## Sheet: Supplementary Table1
Supplementary Table 1. Summary of sequence information for genome assembly.
Libraries	Insert size		Read length N50 (bp)		Total data (Gb)		Depth (×)		Source
PacBio Hi-Fi	20 kb		14839		91.52		30.51		This Study
Nanopore Ont	20 kb		38841		112.02		37.34		Qin et al., 2023
Hi-C	500 bp		150		360		120		This Study

## Sheet: Supplementary Table2
Supplementary Table 2. Genome statistic.
Term	Value
Genome size	3375508540
Number of chromosomes	34
Number of contigs	7797
Contig N50	32.5 Mb
Quality value	68.1486
K-mer completeness	0.9899
Gene completeness	0.9951

## Sheet: Supplementary Table3
Supplementary Table 3. Summary of repeat annotation of different assemblies of sika deer.
Repeat Types	our assembly	GWHBJVV00000000	GWHANOY00000000	our unanchored contigs
SINEs	0.0814	0.0986	0.1031	0.0035
LINEs	0.1924	0.2399	0.2492	0.0099
LTR	0.0293	0.0359	0.0365	0.0023
DNA	0.0241	0.0228	0.023	0.0312
Small RNA	0.0128	0.0153	0.0157	0.0009
Satellites	0.0996	0.0122	0.0007	0.4748

## Sheet: Supplementary Table4
Supplementary Table 4. Summary of RNA-seq data used in this study.
Sample	Size (Gb)	mapping rate	sample type	Platform	Source
lung_1	8.48	0.9262	lung	ILLUMINA	This Study
lung_2	9.22	0.9227	lung	ILLUMINA	This Study
liver_1	7.47	0.9323	liver	ILLUMINA	This Study
liver_2	8.09	0.9295	liver	ILLUMINA	This Study
muscle_1	8.62	0.9374	muscle	ILLUMINA	This Study
muscle_2	6.56	0.9302	muscle	ILLUMINA	This Study
spleen_1	8.07	0.8811	spleen	ILLUMINA	This Study
spleen_2	7.23	0.8871	spleen	ILLUMINA	This Study
skin_1	9.2	0.9246	skin	ILLUMINA	This Study
skin_2	9.14	0.9124	skin	ILLUMINA	This Study
adipose_1	8.09	0.9229	adipose	ILLUMINA	This Study
adipose_2	8.21	0.9206	adipose	ILLUMINA	This Study
PP-dac2_1	6.47	0.9337	antler_pedicle	ILLUMINA	This Study
PP-dac2_2	6.48	0.9357	antler_pedicle	ILLUMINA	This Study
PP-dac5_1	6.48	0.9455	antler_pedicle	ILLUMINA	This Study
PP-dac5_2	6.49	0.9435	antler_pedicle	ILLUMINA	This Study
PP-dac10_1	6.41	0.9411	antler_pedicle	ILLUMINA	This Study
PP-dac10_2	6.51	0.9418	antler_pedicle	ILLUMINA	This Study
PP-dac0_1	5.95	0.94	antler_pedicle	ILLUMINA	This Study
PP-dac0_2	6.75	0.9345	antler_pedicle	ILLUMINA	This Study
SRR8002919	9.16	0.9108	testis	ILLUMINA	Wang et. Al., 2019
SRR8002920	9.41	0.884	frontal_skin	ILLUMINA	Wang et. Al., 2019
SRR8002921	10.02	0.8827	ear_bone	ILLUMINA	Wang et. Al., 2019
SRR8002926	9.25	0.8717	antler_cartilage	ILLUMINA	Wang et. Al., 2019
SRR8002928	8.64	0.9211	antler_velvet	ILLUMINA	Wang et. Al., 2019
SRR8002929	7.08	0.915	antler_pedicle	ILLUMINA	Wang et. Al., 2019
SRR8002942	10.01	0.8866	spleen	ILLUMINA	Wang et. Al., 2019
SRR8002943	9.89	0.9271	muscle	ILLUMINA	Wang et. Al., 2019
SRR8002944	8.05	0.9076	lung	ILLUMINA	Wang et. Al., 2019
SRR8002945	9.93	0.8958	kidney	ILLUMINA	Wang et. Al., 2019
SRR8002956	8.15	0.8977	cerebrum	ILLUMINA	Wang et. Al., 2019
SRR8002957	10.85	0.8654	heart	ILLUMINA	Wang et. Al., 2019
SRR8002959	9.88	0.9287	abomasum	ILLUMINA	Wang et. Al., 2019
SRR8002960	8.88	0.898	cecum	ILLUMINA	Wang et. Al., 2019
SRR8002961	9.28	0.8955	esophagus	ILLUMINA	Wang et. Al., 2019
SRR8002962	7.12	0.9199	liver	ILLUMINA	Wang et. Al., 2019
SRR8002963	10.13	0.9061	reticulum	ILLUMINA	Wang et. Al., 2019
SRR8002964	8.71	0.9007	rumen	ILLUMINA	Wang et. Al., 2019
SRR8002965	7.66	0.9137	adipose	ILLUMINA	Wang et. Al., 2019
SRR8002966	8.06	0.9166	cerebella	ILLUMINA	Wang et. Al., 2019
rumen_1	7.21	0.9109	rumen	ILLUMINA	This Study
rumen_2	10.06	0.9106	rumen	ILLUMINA	This Study
SRR7226085	3.78	-	antler	PACBIO_SMRT	Zhang et. Al., 2022
SRR7226089	3.16	-	antler	PACBIO_SMRT	Zhang et. Al., 2022
SRR7226093	5.18	-	antler	PACBIO_SMRT	Zhang et. Al., 2022
SRR7226095	4.74	-	antler	PACBIO_SMRT	Zhang et. Al., 2022
SRR7226097	4.76	-	antler	PACBIO_SMRT	Zhang et. Al., 2022
SRR7226101	3.24	-	antler	PACBIO_SMRT	Zhang et. Al., 2022
SRR7226106	2.93	-	antler	PACBIO_SMRT	Zhang et. Al., 2022
SRR7226110	3	-	antler	PACBIO_SMRT	Zhang et. Al., 2022

## Sheet: Supplementary Table5
Supplementary Table 5. Summary of quality control stat of single cell data with different reference genome.
Samples	0 dac (old reference ver Qin T.)	2 dac (old reference ver Qin T.)	5 dac (old reference ver Qin T.)	10 dac (old reference ver Qin T.)	0 dac (new reference)	2 dac (new reference)	5 dac (new reference)	10 dac (new reference)
Estimated Number of Cells	6277	4864	8682	10515	7071	5079	11804	11352
Mean Reads per Cell	96208	130318	94441	85128	85405	124801	69463	78851
Median Genes per Cell	1160	1558	1394	1381	2480	2900	3026	3454
Number of Reads	603898911	633864626	819936248	895115975	603898911	633864626	819936248	895115975
Q30 Bases in Barcode	0.953	0.954	0.961	0.954	0.953	0.954	0.961	0.954
Q30 Bases in RNA Read	0.898	0.907	0.915	0.897	0.898	0.907	0.915	0.897
Q30 Bases in UMI	0.95	0.951	0.96	0.953	0.95	0.951	0.96	0.953
Reads Mapped to Genome	0.939	0.952	0.949	0.942	0.946	0.956	0.953	0.946
Reads Mapped Confidently to Genome	0.789	0.848	0.826	0.842	0.87	0.902	0.907	0.908
Total Genes Detected	15692	16112	16516	16198	17180	17314	17867	17523

## Sheet: Supplementary Table6
Supplementary Table 6. Summary of ATAC-seq data in this study.
Samples	Total pairs	Mapped pairs	Mapping ratio
adipose_1	47359000	46468618	0.9812
adipose_2	41919860	41090791	0.9802
liver_1	40638309	39920449	0.9823
liver_2	44004710	43190223	0.9815
lung_1	48074701	47030457	0.9783
lung_2	52286710	51020459	0.9758
muscle_1	51373230	50458536	0.9822
muscle_2	42481542	41724839	0.9822
PP_dac2_1	67634400	66346091	0.981
PP_dac2_2	47222191	46297368	0.9804
PP_dac5_1	42599850	41354497	0.9708
PP_dac5_2	42320976	41635327	0.9838
PP_dac10_1	51512148	49527207	0.9615
PP_dac10_2	51911481	50063173	0.9644
PP_dac0_1	62233285	61245812	0.9841
PP_dac0_2	60610280	59503071	0.9817
skin_1	45075133	44038583	0.977
skin_2	40340690	39100617	0.9693
spleen_1	41939929	41077706	0.9794
spleen_2	43195054	42290090	0.979
rumen_1	45098988	42224591	0.9363
rumen_2	39263127	35409989	0.9019

## Sheet: Supplementary Table7
upplementary Table 7. Summary of quality control stat of single cell data with different reference genome.
Sample	TGs	TFs	TOP3 'ARCHS4 tissue' enrichment terms
adipose	6166	215	adipose white,MEF,uterus
liver	6054	370	Liver,Heart,PancreaticIslet
lung	6245	361	adipose white,lung,intestine large
muscle	6220	404	SKELETAL MUSCLE (BULK TISSUE),RENAL CORTEX,ADIPOSE (BULK TISSUE)
PP_dac2	6541	295	LUNG (BULK TISSUE),OMENTUM,GRANULOSA CELL
PP_dac5	5582	306	OMENTUM,GRANULOSA CELL,HEPATIC STELLATE CELL
PP_dac10	6282	281	OMENTUM,GRANULOSA CELL,LUNG (BULK TISSUE)
PP_dac0	5862	230	LUNG (BULK TISSUE),ADIPOSE (BULK TISSUE),OMENTUM
skin	7002	371	SKIN (BULK TISSUE),KERATINOCYTE,AMNIOTIC FLUID
spleen	5585	301	LUNG (BULK TISSUE),OMENTUM,SPLEEN (BULK TISSUE)
rumen	6555	366	ESOPHAGUS (BULK TISSUE),OMENTUM,LUNG (BULK TISSUE)

## Sheet: Supplementary Table8
Supplementary Table 8. Hub TFs in regulatory networks.
Sample	Hub TFs
adipose	HOXB2,HOXA5,KLF4,HOXC6,HOXB3,HOXA6,HOXA7,HOXB6,HOXB7,HOXA1
liver	HNF4A,FOXA3,FOXA2,HNF1A,NR1H4,FOXA1,HNF4G,GATA4,ONECUT2,RORC
lung	KLF4,FOXA2,FOXA1,ELF3,GATA5,EHF,HOXA5,TBX21,TBX4,GATA6
muscle	MYF6,MYOG,MYOD1,HOXC6,HOXC10,HOXA1,MAFA,MYF5,HOXA7,HOXC9
PP_dac0	KLF4,SP7,JDP2,SP3,TFAP2C,NR3C1,NFE2L2,MYC,ETV1,RXRA
PP_dac2	KLF4,SP7,JDP2,NFE2L2,NR3C1,MYC,IRF1,TFAP2A,RXRA,RXRB
PP_dac5	KLF4,MYC,RUNX2,NFE2L2,TFAP2A,RXRB,NR3C1,JDP2,RXRA,TEAD2
PP_dac10	MYC,TFAP2C,TFAP2A,IRF1,JDP2,AR,NFE2L2,KLF4,ATF3,GATA1
skin	KLF4,TFAP2C,TFAP2A,TFAP2B,MYCN,GATA3,HOXC13,HOXC6,TP63,POU3F1
spleen	EOMES,TBX21,SPIB,PAX5,HOXB2,GATA5,HOXB3,HOXB4,IRF4,ETV5
rumen	FOXI1,FOXO4,AR,GATA2,GATA4,ELF4,ELF3,ZBTB33,RXRG,MYC
antler_CPCR1	MAFF,CEBPD,FOXC2,NFIB,CEBPB,FOXA3,SOX9,NFIA,FOXL1,SOX6
antler_CPCR2	PRDM1,TCF7,TCF7L1,TCF7L2,LEF1,TRIM28,JUND,ETS1,BACH1,ETV1
antler_CPCR3	KLF4,SP7,ID2,MYF6,ATF1,SMAD2,SMAD4,CREM,CREB1,TAL2
antler_CPCR4	FOSL1,PRDM1,FOS,BACH1,NFATC1,NFATC2,BATF3,NFATC4,BATF,NFATC3
antler_CPCR5	FOSL1,FOSL2,JUNB,JUN,JUND,FOS,HEYL,FOSB,MAZ,CREM
antler_CPCR6	KLF4,TFAP2A,RUNX2,ID2,GATA2,AR,RUNX3,FOXL2,MYCN,DLX6
liver_CPCR1	GATA6,HOXB3,EN2,LHX2,MAFK,ERG,ETS1,GABPA,FOXP3,SP3
liver_CPCR2	,PRDM1,LBX2,TFAP4,LHX6,STAT4,VDR,TBX2,SNAI2,NPAS2,BHLHE41
liver_CPCR3	HNF4A,FOXA3,NR1H4,HNF4G,HNF1A,RORC,ONECUT2,RXRG,RXRA,ONECUT1
liver_CPCR4	HNF4A,FOXA3,FOXA1,FOXA2,NR1H4,HNF4G,HNF1A,GATA4,RORC,RXRG
liver_CPCR5	HNF4A,NR1H4,FOXA3,HNF4G,FOXA2,FOXA1,HNF1A,ONECUT2,RORC,ONECUT1
liver_CPCR6	HNF4A,FOXA2,FOXA3,HNF1A,FOXA1,NR1H4,HNF4G,GATA4,ONECUT2,RORC
